# Supplementary material
Source: HighWire-hosted journal article supplement (https://jnm.snmjournals.org/highwire/filestream/94408/field_highwire_adjunct_files/0/101402_Supplemental_Data.pdf)
Supplement: 101402_Supplemental_Data.pdf [file 101402_Supplemental_Data.pdf]

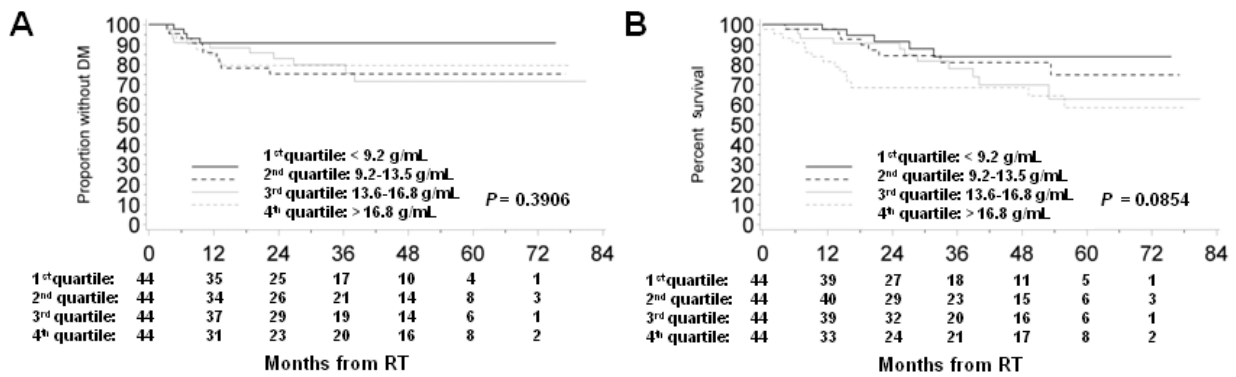

Supplemental Figure 1

Kaplan Meier curves for PET/CT parameter SUV<sub>max</sub> for developing distant metastases or death (a, b) are stratified by quartiles.

A) Distant mets by SUVmax

B) Overall survival by SUVmax

**Supplemental Table 1.** PET parameters for primary tumor and nodal disease by neck level

|                          | SUV max     |            | MTV (cm <sup>3</sup> ) |             | TLG          |             |
|--------------------------|-------------|------------|------------------------|-------------|--------------|-------------|
|                          | Median (SD) | Range      | Median (SD)            | Range       | Median (SD)  | Range       |
| Primary tumor<br>(n=176) | 13.6 (5.5)  | 3.4 – 28.2 | 9.7 (12.9)             | 1.2 – 113.0 | 81.4 (192.0) | 5.4 – 1,964 |
| Level I (n = 10)         | 6.0 (2.3)   | 2.8 – 9.7  | 2.0 (9.5)              | 1.1 – 32    | 8.6 (35.2)   | 2.9 - 118.4 |
| Level II (n = 153)       | 8.8 (5.2)   | 2.4 – 33.3 | 6.7 (8.8)              | 0.79 – 60.8 | 321.1 (77.7) | 4.6 - 442.7 |
| Level III (n = 69)       | 7.8 (3.9)   | 2.4 – 18.6 | 4.0 (8.0)              | 0.6 – 42.0  | 16.3 (68.4)  | 3.3 - 427.3 |
| Level IV (n = 19)        | 7.5 (2.9)   | 3.4 – 14.5 | 3.1 (4.9)              | 0.9 – 19.4  | 10.5 (24.5)  | 6.1 - 92.0  |
| Level V (n = 16)         | 7.5 (3.9)   | 3.0 – 15.1 | 2.2 (3.2)              | 0.5 – 12.6  | 11.8 (14.3)  | 2.7 - 49.3  |
| Level VI (n = 1)         | 7.3         |            | 0.9                    |             | 4.1          |             |

**Supplemental table 2.** Spearman correlation between SUV<sub>max</sub>, TLG and MTV

Spearman correlation between PET variables

|        | SUVmax  | TLG     | MTV     |
|--------|---------|---------|---------|
| SUVmax | 1       | 0.69571 | 0.36395 |
| TLG    | 0.69571 | 1       | 0.90613 |
| MTV    | 0.36395 | 0.90613 | 1       |
